1 Running title: Genome resources of the *Aegilops Sitopsis* species

2

3

4 **Genome sequences of the five *Sitopsis* species of *Aegilops* and the**  
5 **origin of polyploid wheat B-subgenome**

6

7 Lin-Feng Li<sup>1,2,#,\*</sup>, Zhi-Bin Zhang<sup>1,3,#</sup>, Zhen-Hui Wang<sup>4</sup>, Ning Li<sup>1</sup>, Yan Sha<sup>1</sup>,

8 Xin-Feng Wang<sup>2</sup>, Ning Ding<sup>2</sup>, Yang Li<sup>1</sup>, Jing Zhao<sup>1</sup>, Ying Wu<sup>1</sup>, Lei Gong<sup>1</sup>,

9 Fabrizio Mafessoni<sup>3</sup>, Avraham A. Levy<sup>3,\*</sup>, and Bao Liu<sup>1,\*</sup>

10

11 **\* Correspondence:**

12 Lin-Feng Li

13 Email: lilinfeng@fudan.edu.cn

14 Avraham A. Levy

15 avi.levy@weizmann.ac.il

16 Bao Liu

17 Email: baoliu@nenu.edu.cn

18

19 <sup>#</sup>These authors contributed equally to this work.

20

21 **Address:**

22 <sup>1</sup> Key Laboratory of Molecular Epigenetics of the Ministry of Education (MOE), Northeast Normal  
23 University, Changchun 130024, China;

24 <sup>2</sup> Ministry of Education Key Laboratory for Biodiversity Science and Ecological Engineering, School  
25 of Life Sciences, Fudan University, Shanghai 200438, China;

26 <sup>3</sup> Department of Plant and Environmental Sciences, The Weizmann Institute of Science, 76100 Rehovot,  
27 Israel;

28 <sup>4</sup> Faculty of Agronomy, Jilin Agricultural University, Changchun 130118, China.

29

30 **Summary**

31 Bread wheat (*Triticum aestivum* L., BBAADD) is a major staple food crop worldwide. The diploid  
32 progenitors of the A- and D-subgenomes have been unequivocally identified, that of B however remains  
33 ambiguous and controversial but is suspected to be related to species of *Aegilops*, section *Sitopsis*. Here,  
34 we report the assembly of chromosome-level genome sequences of all five *Sitopsis* species, namely *Ae.*  
35 *bicornis*, *Ae. longissima*, *Ae. searsii*, *Ae. sharonensis*, and *Ae. speltoides*, as well as partial assembly of  
36 *Ae. mutica* genome for phylogenetic analysis. Our results support that the donor of bread wheat B-  
37 subgenome is a distinct, probably extinct, diploid species that diverged from an ancestral progenitor of  
38 the B-lineage similar to *Ae. mutica* and *Ae. speltoides*. The five *Sitopsis* species have variable genome  
39 sizes (4.11-5.89 Gb) with high proportions of repetitive sequences (85.99-89.81%); nonetheless, they  
40 retain high collinearity with other wheat genomes. Differences in genome size are primarily due to  
41 independent post-speciation amplification of transposons rather than to inter-specific genetic  
42 introgression. We also identified a set of *Sitopsis* genes pertinent to important agronomic traits that can  
43 be harnessed for wheat breeding. These resources provide a new roadmap for evolutionary and genetic  
44 studies of the wheat group.

45

46 **Key words:** *Aegilops*; *Sitopsis*; Genetic introgression; Genome evolution; Polyploid wheat; *Triticum*

47

48 **Significance**

49 The origin of the B-subgenome of hexaploid bread wheat remains unknown. Here we report the  
50 assembly of chromosome-level genome sequences of all five *Sitopsis* species of the genus *Aegilops*,  
51 which are previously considered as possible direct progenitors or contributors to the B-subgenome. Our  
52 comparative genomic analyses reveal that the B-subgenome originated from an unknown, most likely  
53 extinct species phylogenetically distinct from *Ae. speltoides*, its extant closest relative. We also provide  
54 evidence that *Ae. speltoides* is neither the direct progenitor of the G-subgenome of tetraploid wheat  
55 *Triticum timopheevii*. The high-quality *Sitopsis* genomes provide novel avenues to identify new  
56 important genes for wheat breeding.

57

## 58 Introduction

59 Hexaploid bread wheat (*Triticum aestivum* L.,  $2n = 6x = 42$ , BBAADD) is the most widely grown and  
60 largest acreage crop in the world, providing about 20% of the global calories and proteins in human  
61 consumption<sup>1</sup>. Bread wheat contains three closely related subgenomes (A, B and D) donated by distinct  
62 diploid species, which were reunited via a recent allohexaploid speciation event between a cultivated  
63 tetraploid wheat (genome BBAA) and a diploid goat grass (*Ae. tauschii*, DD) less than 10,000 years  
64 ago<sup>2,3</sup>. The cultivated tetraploid wheat, *T. turgidum* ssp. *durum* or ssp. *dicoccon* was domesticated from  
65 wild emmer wheat (*T. turgidum* ssp. *dicoccoides*, BBAA). Wild emmer wheat itself was formed via an  
66 earlier allotetraploidization event (<0.8 million years ago, MYA) between two wild diploid species of  
67 *Triticum/Aegilops*, which donated the A- and B-subgenomes, respectively<sup>4,5</sup>. It is established that the  
68 A- and D-subgenomes of polyploid wheat are derived from wild diploid wheat *T. urartu* (AA) and goat-  
69 grass *Ae. tauschii* (DD), respectively<sup>6,7</sup>. However, the origin of polyploid wheat B-subgenome remains  
70 unclear and controversial.

71 The hypothesis that the polyploid wheat B-subgenome originated from a diploid *Aegilops* species  
72 of section *Sitopsis* has been proposed since the 1950s. This inference was mainly based on the close  
73 morphological similarity of spikelet and karyotype structure between the *Sitopsis* species (*i.e.*, *Ae.*  
74 *speltoides*) and species of the *Triticum* genus<sup>8,9</sup>. Yet, the comparisons of chromosome structure and  
75 meiotic pairing behavior revealed virtually absence of homologous synapsis between the polyploid  
76 wheat B-subgenome and all *Sitopsis* species genomes<sup>10-12</sup>. Molecular phylogeny and population genetic  
77 inferences showed either high genetic similarity<sup>13</sup> or the closest phylogenetic relationship<sup>5,14-16</sup> of *Ae.*  
78 *speltoides* to the wheat B-subgenome. These molecular and cytological evidences have led to the  
79 monophyletic origin hypothesis purporting that the wheat B-subgenome evolved from *Ae. speltoides* or  
80 a closely related species, but was modified at the polyploid level<sup>8,10,12,17</sup>. An alternative hypothesis is  
81 that the origin of the modern wheat B-subgenome or its diploid progenitor is polyphyletic, being shaped  
82 by hybridization or introgression of diverse genomic sequences from different *Triticum/Aegilops*  
83 species<sup>18-20</sup>. This scenario appeared to be congruent with transcriptome-based phylogenetic inferences  
84 that revealed frequent interspecific hybridizations in the species complex<sup>21</sup>. However, genome-scale  
85 evidence supporting the monophyletic or polyphyletic origins of the polyploid wheat B-subgenome is  
86 lacking.

87 The reference genomes of both hexaploid bread wheat and tetraploid wild emmer/cultivated durum  
88 wheats, as well as their diploid progenitors, *Ae. tauschii* and *T. urartu*, have been released in recent  
89 years<sup>22-27</sup>, but whole genome sequence of the diploid species related to the B-subgenome of polyploid  
90 wheat is not yet available. Here, we report chromosome-level genome assemblies of all the five diploid  
91 species of *Aegilops*, section *Sitopsis*, *i.e.*, *Ae. bicornis*, *Ae. longissima*, *Ae. searsii*, *Ae. sharonensis*, and  
92 *Ae. speltoides*, as well as partial assembly of *Ae. mutica* genome. The reference-quality genome  
93 assemblies of these diploid species, together with those available for polyploid wheat and the A- and

94 D-subgenome diploid progenitor species, provide a comprehensive repertory of genome resources for  
95 deeper evolutionary studies in the *Triticum/Aegilops* species complex. Our results also shed new light  
96 on the evolution of the B-lineage, confirming that *Ae. mutica* is the present-day species most close to  
97 the ancestral progenitor of the B-lineage<sup>21</sup> and supporting that the donor of the polyploid wheat B-  
98 subgenome was a single diploid species, probably extinct, that is most closely related to, but also distinct  
99 from, the still extant *Ae. speltoides*. In addition, we show that the novel genomic resources from the  
100 *Sitopsis* can be mined to identify new genes and natural allele variants that can be utilized to cope with  
101 the ever-increasing global demand for wheat improvement.

102

## 103 **Results**

### 104 *Sequence assemblies and genome features*

105 Identities of the five diploid *Sitopsis* species ( $2n = 2x = 14$ ) of *Aegilops* were confirmed by fluorescence  
106 *in situ* hybridization (FISH) and spike morphology (**Supplementary Fig. 1**). The same, multi-  
107 generation-selfed, individual (bagged) of each species was used for genome sequencing and assembly.  
108 Sizes of the assembled genomes of the five species ranged from 4.11 to 5.89 Gb, broadly consistent  
109 with values (4.45-6.02 Gb) estimated by flow cytometry (**Table 1**). Notably, *Ae. speltoides* (4.11 Gb)  
110 has the smallest genome among the five species, which is close in size to those of the bread wheat D-  
111 subgenome (3.95 Gb)<sup>25</sup> and its donor *Ae. tauschii* (4.30 Gb)<sup>24</sup>. In contrast, the remaining four *Sitopsis*  
112 species, *Ae. bicornis* (5.64 Gb), *Ae. longissima* (5.80 Gb), *Ae. searsii* (5.34 Gb) and *Ae. sharonensis*  
113 (5.89 Gb), all have much larger genomes similar to the polyploid wheat A- (4.86-4.94 Gb) and B-  
114 subgenomes (5.11-5.18 Gb)<sup>22,25,26</sup>, and to the genome of *T. urartu* (4.94 Gb)<sup>23</sup>.

115 To determine the origin of the variable genome content, we annotated both protein-coding genes  
116 and repetitive sequences of the five species and compared with the other relevant wheat species,  
117 including *Ae. tauschii* and *T. urartu*, wild emmer, domesticated durum and bread wheat. A total of  
118 37,201-40,222 high confidence protein-coding genes were predicted in the five *Sitopsis* genome  
119 assemblies, with >92.2% of which being functionally annotated in the GO/KEGG/KOG/NR databases  
120 (**Table 1**). On average, the genes of the *Sitopsis* species encode transcripts of 1,193-1,319 bp in length,  
121 which are comparable to the three bread wheat subgenomes (1,310-1,351 bp) and *Ae. tauschii* (1,144  
122 bp) but longer than to *T. urartu* (998 bp)<sup>23-25</sup>. In addition, our results show that difference in genome  
123 size among the five *Sitopsis* species is mainly attributed to the variable total length of repetitive  
124 sequences (3.54-5.19 Gb, 86.13-88.11% of the total), including 2.94-4.21 Gb (66.48-71.47%)  
125 retrotransposons and 0.52-1.03 Gb (12.54-19.21%) DNA transposons (**Table 1**).

126 Distribution patterns of GC content, protein-coding genes and repetitive sequences were assessed  
127 for the five *Sitopsis* species and bread wheat B-subgenome. Broadly consistent with previously  
128 published genomes of wheat species, all five *Sitopsis* species show higher gene density and lower GC

129 content in distal than proximal chromosomal regions (**Fig. 1a-c**). A general genomic feature of the  
130 repetitive sequences of the five species and bread wheat B-subgenome is that *copia-like* long-terminal  
131 repeat (LTR) retrotransposons tend to cluster at telomeric regions of all seven chromosomes (**Fig. 1d**),  
132 whereas a reverse distribution pattern was observed in the *gypsy-like* LTR retrotransposons (**Fig. 1e**).  
133 It is notable that *Ae. speltoides* shows distinct distribution density of *copia-like* retrotransposons and  
134 CACTA DNA transposons compared to bread wheat B-subgenome and the other four *Sitopsis* species  
135 across all seven chromosomes (**Fig. 1d and f**). Nevertheless, estimates of the overall unique *k*-mer  
136 frequency revealed similar density of repetitive sequence between the five *Sitopsis* species and wheat  
137 B-subgenome (**Fig. 1g**), but far lesser than the A- and D-subgenomes detailed in previous study<sup>28</sup>  
138 (Kruskal-Wallis test,  $p < 0.001$ ). We also performed genome collinearity analyses to assess the  
139 differences in genome structure. Although these *Triticum/Aegilops* species contain large proportions of  
140 repetitive sequences and differ substantially in genome sizes, they still retain high collinear genomes  
141 (**Supplementary Fig. 2**). Notably, two previously identified species-specific translocation events,  
142 4A/5A/7B in tetraploid/hexaploid wheat<sup>29</sup> and 7S<sup>1</sup>/4S<sup>1</sup> translocation in *Ae. longissima*<sup>12,30</sup>, were  
143 confirmed in our genome collinear analyses, corroborating the quality of our genome assemblies.

144

#### 145 ***Molecular phylogeny, divergence time and genetic similarity***

146 Phylogenetic relationships of the five *Sitopsis* and other *Triticum/Aegilops* species were reconstructed  
147 based on single copy orthologous gene (SCOG), reduced representative genomic region (RRGR) and  
148 whole-genome single nucleotide polymorphism (SNP) datasets. Similar to previously inferred  
149 phylogenies<sup>4,21</sup>, the diploid species and polyploid wheat subgenomes fall into three independent clades  
150 corresponding to the A-, B- and D-lineages, with *Ae. speltoides* being clustered with polyploid wheat  
151 B-subgenome (B-lineage) while the rest four *Sitopsis* species being grouped with bread wheat D-  
152 subgenome (D-lineage) and its diploid donor *Ae. tauschii* (D-lineage) (**Fig. 2a and Supplementary Fig.**  
153 **3**).

154 Next, we estimated the time at which the *Triticum/Aegilops* species diverged from each other based  
155 on the same datasets. A genome-wide average was calculated: overall, *Ae. speltoides* diverged from the  
156 wheat B-subgenome donor *ca.* 4.49 MYA (95% highest posterior density (HPD): 4.31-4.67 MYA) (**Fig.**  
157 **2a**). In contrast, bread wheat A- and D-subgenomes diverged from their respective diploid progenitors  
158 at much later times: A-subgenome vs. *T. urartu* (1.28 MYA, 95% HPD: 1.22-1.33 MYA), D-  
159 subgenome vs. *Ae. tauschii* (<0.88 MYA). Given that wild emmer wheat formed no earlier, and  
160 probably much later, than 0.80 MYA<sup>4</sup>, our results rule out the possibility that *Ae. speltoides* is the direct  
161 donor to the polyploid wheat B-subgenome. Of the five D-lineage species, our estimates suggest that  
162 *Ae. tauschii* evolved independently around 5.37 MYA (95% HPD: 5.16-5.58 MYA), which is probably  
163 soon after the homoploid hybridization event between the ancient A- and B-lineages (~5.50 MYA)<sup>4</sup>.

164 The four *Sitopsis* species, *Ae. bicornis*, *Ae. longissima*, *Ae. searsii* and *Ae. sharonensis*, were more  
165 recently diversified from a common ancestor <3.73 MYA (95% HPD: 3.58-3.88 MYA). In parallel, we  
166 also calculated the divergence times between the seven diploid species and wheat B-subgenome along  
167 each of the seven chromosomes (**Supplementary Fig. 4**). We found that *Ae. speltoides* showed later  
168 divergence time in centromeric regions than in telomeric regions from the B-subgenome. A similar  
169 pattern is observed for the five modern D-lineage species (including the rest four *Sitopsis* species) which  
170 also showed variable divergence times along the entire chromosome lengths. In particular, the four D-  
171 lineage *Sitopsis* species showed apparent later divergence times from wheat B-subgenome in several  
172 subtelomeric regions (*i.e.*, chromosomes 2 and 7) than did *Ae. speltoides*. Nonetheless, all the seven  
173 diploid species showed earlier divergence times from wheat B-subgenome (>1.00 MYA) than the  
174 speciation time of wild emmer wheat (<0.80 MYA) across all seven chromosomes.

175 Taking advantage of a recently assembled bread wheat cultivar (LongReach Lancer) with its near  
176 entire chromosome 2B (*ca.* 450 Mb in length) being substituted by the *T. timopheevii* G-subgenome<sup>27</sup>,  
177 together with our assembled sequence contigs of *Ae. mutica* (B-lineage), we constructed a separate  
178 phylogeny based on 3,107 RRGRs within this chromosomal segment of all pertinent diploid  
179 *Triticum/Aegilops* species and polyploid wheat subgenomes (**Supplementary Fig. 5a**). Overall, we  
180 found that the segment-based inferences are highly consistent with the whole-genome molecular  
181 phylogenies and divergence times inferred above (**Fig. 2a** and **Supplementary Fig. 3**) and in previous  
182 studies<sup>4,21</sup>. For example, *Ae. mutica* belongs to the B-lineage and diverged from *Ae. speltoides* and B-  
183 subgenome at a more ancient time (6.37 MYA, 95% HPD: 5.97-6.79 MYA), confirming that *Ae. mutica*  
184 can thus be definitely considered as the extant representative most directly related to the B-lineage  
185 ancestor<sup>21</sup>. Notably, *Ae. speltoides* diverged from *T. timopheevii* G-subgenome *ca.* 2.85 MYA, (95%  
186 HPD: 2.51-3.24 MYA) *i.e.*, after its divergence from the B-subgenome progenitor (*ca.* 4.49 MYA).  
187 This makes the donor of the G-subgenome substantially older than the estimated allotetraploidization  
188 time (<0.4 MYA) leading to speciation of *T. araraticum*, the wild progenitor of *T. timopheevii*<sup>5</sup>. From  
189 this analysis, it is clear that *Ae. speltoides* is also not the direct donor to the G-subgenome of *T.*  
190 *timopheevii*, although it is more closely related to the G-subgenome than to the B-subgenome. This is  
191 consistent with earlier reports showing that *Ae. speltoides* shares near identical cytoplasmic genomes  
192 with *T. timopheevii* (donated by the G-subgenome progenitor) but not *T. turgidum* and *T. aestivum*  
193 (donated by the B-subgenome progenitor)<sup>31</sup>. Similar relationships were seen in gel blotting patterns  
194 probed by nuclear repeats<sup>32</sup>.

195 To gain further insights into genome-wide genetic similarities of these *Triticum/Aegilops* species,  
196 we calculated genetic relatedness, genetic distance, synonymous ( $d_s$ ) and nonsynonymous ( $d_n$ )  
197 substitution rates based on collinear genes, SCOGs and RRGRs. In line with the divergence times  
198 detailed above, the wheat B-subgenome is highly divergent from all the extant diploid  
199 *Triticum/Aegilops* species, while being most closely related to *Ae. speltoides* (**Fig. 2b** and

200 **Supplementary Fig. 6).** It is notable that the polyploid wheat A- and D-subgenomes display high  
201 genetic similarity to their respective diploid donors, *T. urartu* and *Ae. tauschii*, homogeneously across  
202 the entire length of each of the seven chromosomes (**Fig. 2c**). However, *Ae. speltooides* shows higher  
203 genetic similarity to the wheat B-subgenome in centromeric regions than in telomeric regions (**Fig. 2c**),  
204 mirroring the pattern of divergence time detailed above (see **Supplementary Fig. 4**). This bipartite  
205 divergence pattern was also observed in the comparisons of the three recently split B-lineage  
206 species/subgenomes (*Ae. speltooides*, B- and G-subgenomes) (**Supplementary Fig. 5b**). By contrast, *Ae.*  
207 *mutica* (B-lineage) and other *Sitopsis* species (D-lineage) show relatively lower genetic similarities to  
208 the wheat B-subgenome (**Fig. 2c** and **Supplementary Fig. 5b**). Together, these genomic features  
209 suggest that (i) the ancestral B-lineage should have had at least four distinct diploid species, namely *Ae.*  
210 *speltooides*, *Ae. mutica*, the progenitors of bread wheat B-subgenome and Timopheevii wheat G-  
211 subgenome; (ii) the bread wheat B-subgenome is of monophyletic origin, *i.e.*, from a single unknown  
212 diploid species, now extinct or yet undiscovered, that is phylogenetically close to the extant *Ae.*  
213 *speltooides*; and (iii) genetic introgression may have occurred between the diploid progenitor species of  
214 bread wheat B-subgenome and other *Aegilops* species.

215

#### 216 ***Heterogeneous variation pattern and genetic introgression***

217 It has been proposed that interspecific hybridization occurred frequently in many of the  
218 *Triticum/Aegilops* species at various evolutionary stages<sup>18,21,33,34</sup>. We thus investigated whether  
219 hybridization/introgression also occurred, and if so, to what extent it had shaped the genomes of the  
220 five *Sitopsis* species. We found that the B-lineage *Ae. speltooides* and polyploid wheat B-subgenome  
221 show distinct phylogenetic topologies in 261 (11.3%) of the 2,314 representative genomic regions,  
222 especially at the recombination-active distal chromosome regions (**Supplementary Fig. 7**). Likewise,  
223 the five D-lineage species (including the four *Sitopsis* species) also show distinct phylogenetic  
224 topologies, but in higher ratio than of the B-lineage, namely in ~35.9% of the total genomic regions  
225 (**Supplementary Fig. 7**). The observed heterogeneous patterns along all seven chromosomes suggest  
226 the possibilities of either incomplete lineage sorting (ILS) or genetic introgression between the five  
227 *Sitopsis* species and their relatives. By computing *D*-statistic, *fd*, hybrid index ( $\gamma$ ) and  $\chi^2$  goodness of fit  
228 test, we confirm the previously proposed ancestral homoploid hybridization origin of the D-lineage (**Fig.**  
229 **3a,b** and **Supplementary Fig. 8**) between the ancestral A- and B-lineages<sup>4,21,33,34</sup>.

230 Previous cytogenetic studies showed that karyotypes of the four *Sitopsis* species (D-lineage) are  
231 more similar to *Ae. speltooides* (B-lineage) than to *Ae. tauschii* (D-lineage)<sup>35</sup>. This observation was also  
232 supported by transcriptome-based phylogenetic inference that genetic introgression probably occurred  
233 from *Ae. speltooides* to the common ancestor of D-lineage *Sitopsis* species after its separation from *Ae.*  
234 *tauschii*<sup>21</sup>. We propose a different scenario whereby the introgression event more likely occurred from



235 the common ancestor of *Ae. speltoides* and wheat B-subgenome (earlier than 4.49 MYA) to the four D-  
236 lineage *Sitopsis* species (**Fig. 3b**). This scenario of ancestral genetic introgression is also confirmed by  
237 the distribution pattern of introgressed-sites (*i*-sites) (**Supplementary Fig. 9a**). For example, all the  
238 four D-lineage *Sitopsis* species possess relatively more *i*-sites with both the *Ae. speltoides* and bread  
239 wheat B-subgenome (1.44% of the total SNPs) (putatively derived from their common ancestor)  
240 compared to those of from each of the two B-lineage species (0.90% and 1.04%) and the putative A-  
241 lineage (diploid *Triticum*) donor (1.31%). In contrast, the same D-lineage species *Ae. tauschii* harbors  
242 similar proportions of *i*-sites to *Ae. speltoides* (0.26%), B-subgenome (0.26%) and their common  
243 ancestor (0.30%), but which is markedly lower than the other A-lineage donor, *T. urartu* (0.89%). In  
244 line with these observations, allele frequency-based inference of migration also confirmed the ancestral  
245 genetic introgression from B- to D-lineage (**Supplementary Fig. 10**). In particular, we identified  
246 several genomic regions that show high genetic similarity between the D-lineage *Sitopsis* species and  
247 either of the *Ae. speltoides* and bread wheat B-subgenome (**Supplementary Fig. 11 and 12**), suggesting  
248 the possibility of genetic introgressions between the B- and D-lineages. These features together may  
249 explain why the four D-lineage *Sitopsis* species have higher genetic similarity to the wheat B-  
250 subgenome in some genomic regions than to their otherwise phylogenetically closer relative, *Ae.*  
251 *tauschii*. It is notable that previous studies have proposed some additional post-ancestral homoploid  
252 hybridization genetic introgressions among the A-, B- and D-lineage species<sup>18,21,33,34</sup>. Broadly consistent  
253 with these studies, our integrated analyses also identified genetic introgressions from D- to B-lineage,  
254 although some differences were observed between the datasets and methodologies used  
255 (**Supplementary Fig. 8 and 10**).

256 Among the four D-lineage *Sitopsis* species, Waines and Johnson<sup>36</sup> have proposed that *Ae.*  
257 *sharonensis* is likely a hybrid between *Ae. longissima* and *Ae. bicornis* based on morphology and  
258 cytogenetic analyses. Our estimates however did not find evidence for this possibility. The observed  
259 heterogeneous pattern was more likely due to incomplete sorting of ancestral polymorphisms (**Fig. 3b**).  
260 In line with this conclusion, we found that *Ae. sharonensis* not only possesses high proportion of  
261 species-private SNPs (8.80% of the total SNPs) but also shares low proportion of species-shared SNPs  
262 with *Ae. bicornis* (1.27%) (**Supplementary Fig. 9b**). It is notable that all the extant D-lineage species  
263 were established through a single ancestral homoploid hybridization event, as reported by Marcussen  
264 *et al.*<sup>4</sup> (2014) and modified by Glemin *et al.*<sup>21</sup> (2019). We thus asked whether the above identified  
265 genetic introgressions have differentially sculptured the genomes of the five extant D-lineage species  
266 (including the four *Sitopsis* species). Through comparing the distribution patterns of A- and B-lineage  
267 specific SNPs, we found that genomic regions containing more A-lineage specific SNPs (A-dominant)  
268 are clustered at the recombination-inert proximal regions across all seven chromosomes  
269 (**Supplementary Fig. 13**). In contrast, species-specific SNPs identified in either *Ae. speltoides* (B-  
270 lineage) or bread wheat B-subgenome (B-lineage) mainly distributed at the recombination-active distal

271 chromosomal regions. In particular, the *Sitopsis* species (excluding *Ae. speltoides*) harbor more B-  
272 lineage species-specific SNPs compared to *Ae. tauschii* (D-lineage), confirming the above identified B-  
273 to D-lineage introgression in the *Sitopsis* species. Together, our genome-scale estimates revealed  
274 frequent post-ancestral homoploid hybridization introgressions among the *Triticum/Aegilops* species  
275 (**Figure 3c**), which may have shaped the genomes of extant *Sitopsis* species.

276

### 277 *Post-speciation amplification of transposable elements*

278 The genome features detailed above revealed differences in genome content between the five *Sitopsis*  
279 species and their close relatives (see in **Figure 1** and **Table 1**). We thus assessed whether the differences  
280 in genome content are due to the genetic introgressions (see in **Figure 3**) or independent  
281 expansion/contraction of transposable elements (TEs). At the overall level, our analyses revealed that  
282 2.73-3.95 Gb (77.6%-81.2%) of the genome components of these *Triticum/Aegilops* species are  
283 composed of the *gypsy-like*, *copia-like* and *CACTA* TE families (**Supplementary Fig. 14a-b**). Between  
284 the two B-lineage species/subgenome, about 0.97 Gb (90.4%) of the genome size difference can be  
285 attributed to the high copy numbers of *gypsy-like* and *CACTA* TEs in polyploid wheat B-subgenome  
286 relative to *Ae. speltoides* (**Supplementary Fig. 14c**). In the D-lineage, compared to *Ae. tauschii*, all  
287 three types of TEs (*gypsy-like*, *copia-like* and *CACTA*) show higher copy abundance in the two earlier  
288 established species *Ae. bicornis* (1.39 Gb, accounting for 82.9% of the genome size difference) and  
289 *Ae. searsii* (1.00 Gb, 89.8% of the difference). In contrast, only *gypsy-like* and *copia-like* TEs exhibit  
290 high copy numbers in the two more recently established *Sitopsis* species, *Ae. longissima* (1.47 Gb, 93.6%  
291 of the difference) and *Ae. sharonensis* (1.54 Gb, 92.3% of the difference).

292 To examine whether specific repetitive sequences have contributed to the differences in genome  
293 content, we further characterized 85 retrotransposon and transposon subfamilies that are responsible  
294 for >90.0% of the genome size differences among the *Triticum/Aegilops* species (**Fig. 4a**). In line with  
295 the above results, differential abundance of two *gypsy-like* subfamilies (*RLG\_famc3.1* and  
296 *RLG\_famc3.4*) account for about 10.7% of the genome size differences between the polyploid wheat  
297 B-subgenome and *Ae. speltoides* (**Fig 4a**). Likewise, different copy numbers of 29 subfamilies are  
298 responsible for the different genome content among the five D-lineage species. Intersection analysis  
299 showed that the 20 and 19 lineage-specific retrotransposon and transposon subfamilies contributed to  
300 625.8 Mb (58.5% of B-lineage) and 479.4-1027.4 Mb (43.0-63.0% of D-lineage) of the genome size  
301 differences in the B- and D-lineage species, respectively (**Fig. 4b** and **Supplementary Table 1**). In  
302 contrast, seven subfamilies that were shared between the B and D-lineages account for 383.2 Mb (35.8%  
303 of B-lineage) and 466.7-502.8 Mb (29.5-42.0% of D-lineage) of the differences in genome contents. It  
304 suggests that genome size differences within the B- and D-lineages are primarily due to distinct  
305 proportions of the specific TE subfamilies.

306 We next estimated the burst time of retrotransposons to reexamine whether they were expanded or  
307 contracted independently in the B- and D-lineages. If the retrotransposons expanded in the B- and D-  
308 lineages are directly derived from the above identified inter-specific genetic introgressions (detailed in  
309 **Fig. 3b**), we would expect to identify pre-introgression (>4.49 MYA) burst of the retrotransposons in  
310 the two lineages. However, our estimates identified relatively recent retrotransposon amplifications  
311 (<3.00 MYA) in all the diploid species and polyploid wheat subgenomes (**Fig. 4c**). It is notable that  
312 both the A- and B-subgenomes of the three polyploid wheats (emmer, durum and bread) have  
313 experienced a common recent retrotransposon expansion (~0.5 MYA), most likely after the  
314 allotetraploidization event *ca.* 0.8 MYA. Consistent with this inference, their diploid donors (*T. urartu*  
315 and *Ae. tauschii*) and the five *Sitopsis* species do not share this recent retrotransposon burst. We next  
316 compared the insertion times of these retrotransposon families relative to the allotetraploidization event  
317 (0.8 MYA). In the B-lineage, about 55.6-55.7% of the earlier expanded retrotransposons (>0.8 MYA)  
318 in polyploid wheat B-subgenome can be attributed to the *gypsy*-like retrotransposons (**Fig. 4 d-e** and  
319 **Supplementary Table 2**). However, *Ae. speltoides* possesses more recently (<0.8 MYA) amplified  
320 *copia*-like retrotransposons (67.0% of the total) compared to the polyploid wheat B-subgenome (40.5%-  
321 41.2%). It may explain why *Ae. speltoides* shows distinct distribution density of *copia*-like  
322 retrotransposons compared to B-subgenome and the other *Sitopsis* species (see in **Figure 1**). In the D-  
323 lineage, the *copia*-like families are responsible for 52.6-59.9% of the recent amplified retrotransposons  
324 (<0.8 MYA) in the four *Sitopsis* species (**Fig. 4 d-e** and **Supplementary Table 2**). In contrast, only  
325 37.8-45.1% of the recent expanded retrotransposons are *copia*-like families in polyploid wheat D-  
326 subgenome and its donor *Ae. tauschii*, supporting the above observed distinct evolutionary histories of  
327 the five modern D-lineage species. In the A-lineage, slightly lower proportions of recently expanded  
328 *copia*-like families were identified in the polyploid wheat A-subgenome (31.2-31.9%) compared to  
329 their diploid donor *T. urartu* (34.6%). We also estimated the insertion times for the expansion of the  
330 above identified TE subfamilies in the seven diploid species and wheat B-subgenome. All these TE  
331 subfamilies possess insertion times <3.00 MYA (**Supplementary Fig. 15**), which are later than the  
332 ancestral B- to D-lineage introgression (4.49 MYA) (detailed in **Fig. 2a**). In particular, all the four D-  
333 lineage *Sitopsis* species possess distinct expansion patterns of these TE subfamilies compared to *Ae.*  
334 *speltoides* and B-subgenome, even those that are expanded in both the B- and D-lineages  
335 (**Supplementary Fig. 15**). As these retrotransposon and transposon subfamilies are responsible for >90%  
336 genome size differences, it suggests that the increased genome content in D-lineage *Sitopsis* species  
337 compared to *Ae. tauschii* is more likely due to the post-speciation expansions/contractions of a few  
338 specific active TEs rather than to the direct B- to D-lineage genetic introgression.

339

340

341

## 342 ***Pan-genomic analyses of the *Triticum/Aegilops* species***

343 Pan-genomic analyses of the *Triticum/Aegilops* species were performed based on protein-coding genes  
344 and genome structural variations (SVs). The five *Sitopsis* species contain 23,456-24,344 gene families,  
345 56.3% (17,595) of which are shared with the other diploid and polyploid wheat species, probably  
346 representing the core gene set of *Triticum/Aegilops* species complex (**Fig. 5a**). In addition, a total of  
347 11,580 (34.4%) dispensable and 2,798 (9.3%) species-specific gene families were also identified from  
348 these *Triticum/Aegilops* species. Of these orthologous gene families, from 419 (1.11%) to 1,086 (2.56%)  
349 species-specific genes and from 1,406 (3.78%) to 1,455 (3.79%) specifically expanded genes were  
350 identified in the five *Sitopsis* species (**Fig. 5a**). Functional analyses of the *Sitopsis*-specific and  
351 expanded genes reveal significant enrichment in basic cellular activities, including DNA recombination,  
352 DNA integration and metabolic process (**Fig. 5b** and **Supplementary Table 3**). Based on the same  
353 protein-coding gene set, we characterized evolutionarily conserved genomic regions by identifying the  
354 shared syntenic orthologous genes in the *Triticum/Aegilops* species. Our results reveal that centromeric  
355 regions of all seven chromosomes possess very few numbers of core putative proto-genes (pPGs)  
356 (present in all diploid species and polyploid wheat subgenomes) (**Supplementary Fig. 16**), suggesting  
357 the low level of genetic conservation of centromeric regions in the *Triticum/Aegilops* species. In  
358 addition, we identified several large genomic regions that are evolutionarily non-conserved in the B-  
359 and D-lineages. For example, two large non-conserved genomic regions near the telomere of  
360 chromosome 2 are potentially correlated with the evolutionary divergence between the five *Sitopsis* and  
361 their close relatives, wheat B-subgenome (B-lineage) and *Ae. tauschii* (D-lineage) (**Supplementary**  
362 **Fig. 16c** and **e**).

363 Pan-genomic analyses were also performed with the genome-wide SVs characterized from the  
364 seven diploid *Triticum/Aegilops* species. A total of 38,994 common SVs were identified in the five  
365 *Sitopsis* species (ranging from 37,039 to 37,721 in each species), 18,153 of which are shared with the  
366 two diploid species, *Ae. tauschii* (DD) and *T. urartu* (AA) (**Supplementary Fig. 17a**). Of the shared  
367 SVs, 16,337 monomorphic SVs that are fixed in the seven diploid species compared to polyploid wheat  
368 B-subgenome were excluded, leaving 1,816 polymorphic insertions/deletions in the genome-scale SV  
369 dataset. Further analyses of the 1,816 polymorphic SVs show that while these SVs scattered randomly  
370 along the seven chromosomes (**Supplementary Fig. 18**), the seven diploid species possessed five to  
371 120 species-specific SVs (**Fig. 5c** and **Supplementary Fig. 17b-c**). For example, while *Ae. speltoides*  
372 is phylogenetically close to the B-subgenome, it still carries 120 (6.61% of the total polymorphic SVs)  
373 species-specific SVs compared to the B-subgenome and all the other diploid species. Compared to the  
374 above *Sitopsis*-specific and expanded genes that are mainly involved in basic cellular activities, the SV-  
375 associated genes identified in the five *Sitopsis* species are correlated with several functional important  
376 phenotypes, such as photomorphogenesis, DNA methylation, chromatin silencing and topology,  
377 meristem and flower development (**Fig. 5d** and **Supplementary Table 4**).

378

### 379 *The Sitopsis genomic resource*

380 The *Aegilops* species represent the secondary gene and germplasm pools for wheat genetic  
381 improvement<sup>37</sup>. We thus examined whether the five *Sitopsis* species contain homoeologous genes  
382 related to agronomic and pathogen-resistant traits of durum and bread wheats. Our genome-wide  
383 screening of the functional nucleotide-binding site and leucine-rich repeat (NBS-LRR) domains  
384 identified a total of 5,867 genes in the 14 diploid species and polyploid wheat subgenomes. Further  
385 redundancy analysis revealed that the total NBS-LRR gene pool consists of 2,573 (95% identity) to  
386 4,439 (100% identity) unique genes in the *Triticum/Aegilops* species, with 90% of the NBS-LRR genes  
387 being contained in 12 (95% sequence identity) and 13 (100% sequence identity) wheat genomes,  
388 respectively (**Supplementary Fig. 19a**). It suggests that the 5,867 NBS-LRR genes may represent the  
389 core resistant gene set of *Triticum/Aegilops* species. In particular, the 5,867 NBS-LRR genes are mostly  
390 distributed at the distal chromosomal regions in all the *Triticum/Aegilops* species (**Supplementary Fig.**  
391 **19b**). This is broadly consistent with previous findings that gene families and QTLs associated with  
392 adaptation to biotic and abiotic stresses are mainly clustered near the subtelomeric chromosome regions  
393 in polyploid wheat<sup>25-27</sup>.

394 We noted that the five *Sitopsis* species (388-490) contain relatively more NBS-LRR gene families  
395 than do the other two diploid species, *Ae. tauschii* (350) and *T. urartu* (318), and the two subgenomes  
396 of wild emmer wheat (239-286), but are comparable to the domesticated durum (326-435) and bread  
397 wheat (401-542) (**Supplementary Fig. 20a**). Intersection analysis of these NBS-LRR gene families  
398 allocated 116 (38.8%), 167 (57.5%) and 12 (3.7%) as core, dispensable and *Sitopsis*-specific gene  
399 families (**Supplementary Fig. 20b**). The 116 core and 167 dispensable NBS-LRR gene families are  
400 the major components of innate immune system in the *Triticum/Aegilops* species. Thus, the 11 *Sitopsis*-  
401 specific NBS-LRR gene families may provide specific genetic resources for the improvement of disease  
402 resistance in domesticated durum and bread wheats. In addition, we also characterized a set of  
403 homoeologous genes in the five *Sitopsis* species, which are related to stripe rust (*Puccinia striiformis* f.  
404 sp. *tritici*, *Pst*) and powdery mildew (*Blumeria graminis* f. sp. *tritici*, *Bgt*) resistance (**Supplementary**  
405 **Table 5**). Because *Pst* and *Bgt* are two major fungal diseases causing heavy yield loss of wheat  
406 worldwide<sup>38</sup>, the novel resistant genes we identified in the *Sitopsis* species might be important genetic  
407 resources for future wheat breeding.

408 For agronomic traits, we checked the copy number and nucleotide variation pattern of two major  
409 domestication genes related to the non-shattering phenotype, namely, free-threshing seed (*Q/q*) and  
410 nonfragile rachis (*Btr/btr*) (**Supplementary Table 5**). The *Q/q* gene encodes an AP2-like transcription  
411 factor that confers free-threshing and also has pleiotropic effects on a number of other domestication  
412 traits, including rachis fragility, spike architecture, and flowering time<sup>39-41</sup>. The seven diploid

413 *Triticum/Aegilops* species and their attendant natural and resynthesized polyploids with diverse genome  
414 combinations, including BBAA, S<sup>sh</sup>S<sup>sh</sup>A<sup>m</sup>A<sup>m</sup>, S<sup>l</sup>S<sup>l</sup>AA, S<sup>b</sup>S<sup>b</sup>DD and AADD, all show substantial  
415 morphological differences in inflorescence structure<sup>42</sup> and distinct *Q/q* allele expression patterns<sup>43</sup>. Here  
416 we show that while all the five *Sitopsis* species harbor the wild type *q* allele (L<sub>329</sub>), it is different from  
417 that of the durum and bread wheat A-subgenome domesticated *Q* allele (I<sub>329</sub>) and their diploid donor *T.*  
418 *urartu* *q* allele (V<sub>329</sub>), and contains numerous unique synonymous and nonsynonymous mutations  
419 (**Supplementary Fig. 21** and **Dataset**). Similar phenomenon was also observed in the two nonfragile  
420 rachis genes (*Btr1* and *Btr2*) in which many genetic variants are found in the five *Sitopsis* species  
421 (**Supplementary Table 5** and **Dataset**). It has been documented that novel SNPs in the miRNA binding  
422 site at *Q/q* gene are correlated with changes in transcriptional regulation and plays pleiotropic roles in  
423 growth and reproductive development<sup>44</sup>. Thus, the natural variations we identified in the *Sitopsis*  
424 species are potentially valuable in breeding new wheat cultivars. In addition, we also characterized  
425 candidate genes that are functionally associated with other important agronomic traits (*i.e.*, tiller number  
426 and kernel size) and floral development (*i.e.*, vernalization and photoperiod-insensitive)  
427 (**Supplementary Table 5**). These genic and genetic resources might be key variants for future wheat  
428 breeding or *de novo* domestication of new types of wheat.

429

## 430 Discussion

431 We have assembled chromosomal level reference genomes of all five *Aegilops* species of the *Sitopsis*  
432 section and conducted comparative genomic analyses both among the five species and with the other  
433 available diploid species and polyploid wheat subgenomes. Our main motivation was to better  
434 understand the evolutionary histories and trajectories of the *Sitopsis* species and especially, the origin  
435 of the polyploid wheat B-subgenome as it has long been debated. A long-standing hypothesis posited  
436 that the wheat B-subgenome was derived monophyletically from *Ae. speltoides*<sup>9</sup>. This was formulated  
437 based on multiple lines of observational and empirical evidence, including botanical, cytological,  
438 phylogenetic and biogeographical<sup>37</sup>. Although this hypothesis was already questioned nearly 50 years  
439 ago based on the near absence of homologous synapsis between the S- and B-subgenome chromosomes  
440 in artificial hybrids involving both higher- and lower- pairing types of *Ae. speltoides*<sup>10,11,20</sup>, it was  
441 revised by an extensive molecular marker-based population study<sup>16</sup>. An alternative hypothesis is that  
442 both the extant *Ae. speltoides* and wheat B-subgenome/its progenitor diverged from their original  
443 common ancestor at both the diploid and polyploid levels<sup>8,12,17,45</sup>. Our genome-scale comparative  
444 analyses show that *Ae. speltoides* and the B-subgenome have diverged ~4.49 MYA, *i.e.*, at a much  
445 earlier time than the speciation of tetraploid emmer wheat approximately 0.8 Mya<sup>4</sup>. In other words,  
446 major divergence between *Ae. speltoides* and the B-subgenome diploid donor should have occurred at  
447 the diploid level. Moreover, the estimates of genome-wide genetic similarity between B-subgenome  
448 and *Ae. speltoides* is far less than those of the A- and D-subgenomes from their respective diploid

449 donors, *T. urartu* and *Ae. tauschii*. Together, our results lead to the unequivocal conclusion that *Ae.*  
450 *speltoides* is not the direct progenitor to the B-subgenome. Similarly, based on an independent analysis  
451 of a chromosomal segment corresponding to a *ca.* 450 MB segment covering almost the entire  
452 chromosome 2B<sup>27</sup>, we show that *Ae. speltoides* is also not the direct donor to the G-subgenome of *T.*  
453 *timopheevii*.

454 Another hypothesis for the origin of the wheat B-subgenome posits that it had formed through  
455 multiple hybridizations and introgressions of diverse genomic sequences from *Sitopsis* species at the  
456 tetraploid level. According to this polyphyletic scenario, the tetraploid wild emmer wheat (*T. turgidum*  
457 *ssp. dicoccoides*) was likely established through the intercrossing of two or more amphiploids with the  
458 same A genome species (*T. urartu*) but different S-genome donors (*Sitopsis* species)<sup>8,19</sup>. However, the  
459 observed heterogeneous genomic patterns between the five *Sitopsis* species and wheat B-subgenome  
460 are more likely due to incomplete sorting of ancestral alleles and B-to-D lineage genetic introgressions.  
461 This refutes polyphyletic origins of wheat B-subgenome from diverse *Sitopsis* species at the tetraploid  
462 level. Alternatively, the direct progenitor of wheat B-subgenome itself might be of polyphyletic origin  
463 through the hybridizations/introgressions between two or more distant ancestral B-lineage species at  
464 the diploid level<sup>18</sup>. However, our comparisons clearly show that the four extant B-lineage  
465 species/subgenomes (*Ae. speltoides*, *Ae. mutica*, B-subgenome and G-subgenome) are evolutionarily  
466 independent from each other. Together, we conclude that the direct donor of the B-subgenome is a  
467 distinct diploid species that diverged from *Ae. speltoides* 4.49 MYA, but which experienced genetic  
468 introgressions with the D-lineage *Sitopsis* species before its hybridization with *T. urartu* leading to  
469 formation of *T. turgidum*. However, it still remains mysterious why both of the diploid progenitor  
470 species to the B- and G-subgenomes went extinct while their two congeneric species, *Ae. speltoides* and  
471 *Ae. mutica*, are extant. It might be that both diploid donors were out-competed by their tetraploid  
472 progeny species, *T. turgidum*, *ssp. dicoccoides* and *T. araraticum*, the wild progenitor of *T. timopheevii*,  
473 or that the B and G donors remain to be discovered. The latter is possible but not very likely considering  
474 that there has been much effort to find these species in the levant.

475 We also performed genomic comparisons to elucidate evolutionary dynamics of the  
476 *Triticum/Aegilops* species complex. Our results reveal high collinear genome structure among the  
477 *Sitopsis* species, albeit they all contain high but markedly variable proportions of repetitive sequences.  
478 The differences in genome size among the *Triticum/Aegilops* species are primarily due to independent  
479 post-speciation amplification of a few specific TEs. In addition, we show how detailed comparisons  
480 between the reference-quality genome assemblies of the *Sitopsis* species and the wheat subgenomes  
481 may open new avenues for the utilization of this set of important genic and genetic resources (*i.e.*,  
482 homoeologous genes related to agronomic and pathogen-resistant traits) for future wheat breeding. The  
483 high-quality genome assemblies for the *Sitopsis* species together with those of other species in the

484 *Aegilops/Triticum* complex enable an unprecedented opportunity for further evolutionary, genetic and  
485 breeding studies in the wheat group.

486

#### 487 **Acknowledgements**

488 We thank Moshe Feldman for critical reading and constructive comments. This study was supported by  
489 the Natural Science Foundation of China (#31991211 to B.L. and #31970235 to L.F.L.), the Shanghai  
490 Pujiang Program (#19PJ1401500 to L.F.L.), the Israel Science Foundation (ISF)-China National  
491 Natural Science Foundation (NSFC) collaborative grant to B.L. (#32061143001) and A.A.L. (#3394/20)  
492 and China Postdoctoral Science Foundation Grant (2021M690683).

493

#### 494 **Additional information**

495 Supplementary information is available for this manuscript at xxx.

496

#### 497 **Author contributions**

498 L.F.L., A.A.L., and B.L. conceived this project and coordinated research activities; Y.S. and Y.L.  
499 collected and maintained the plant materials; Y.S., Y.W. and J.Z. took the photos of the spikes of the  
500 *Triticum/Aegilops* species and carried out the FISH experiments; Y.W. performed the flow cytometry;  
501 Z.H.W. conducted the genome collinear comparisons; F.M. Z.B.Z. and X.F.W. reconstructed the  
502 phylogeny and estimated the divergence time and genetic introgression; Z.H.W., N.L. and Z.B.Z.  
503 carried out the pan-genomic analyses; N.L. and Z.B.Z. annotated the repetitive elements; N.L. analyzed  
504 the genome structural variations; Z.B.Z., Y.S. and Z.H.W. identified the domestication and resistance  
505 genes; N.D. and X.F.W. carried out the synonymous and non-synonymous substitution analyses; L.F.L.,  
506 A.A.L., G.L., F.M. and B.L. wrote the manuscript. All authors discussed the results and approved the  
507 manuscript.

508

#### 509 **Online content**

510 Any methods, additional references, Nature Research reporting summaries, source data, statements of  
511 data availability and associated accession codes are available at xxxxx. All sequence reads assemblies  
512 have been deposited into the National Center for Biotechnology Information under accession no.  
513 PRJNA700474.

514

515



516 **Competing interests**

517 The authors declare no competing interests.

518

519 **Online Methods**

520 **Plant materials, DNA and RNA extraction.** All the five *Sitopsis* species were grown in greenhouse  
521 under following conditions: temperatures of 25/16 °C (day/night), photoperiod of 16/8 hour (day/night).  
522 Specimen identification was performed by checking the spike morphology and chromosome karyotype.  
523 Inflorescence morphology was captured by digital single lens reflex camera (EOS 6D MARK II) in  
524 photo studio. Karyotypes of the five species were checked using fluorescence in situ hybridization  
525 (FISH) according to Han *et al.* (2005)<sup>46</sup> and Kato *et al.* (2004)<sup>47</sup> with minor modifications. The haploid  
526 genome size was estimated with flow cytometry using Attune focusing analyzer (ABI, CA, USA).  
527 Genomic DNA was isolated from fresh leaf tissue using CTAB. Total RNAs were extracted from root,  
528 leaf and inflorescence tissues independently based on standard TRIzol<sup>®</sup> protocol (TRIzol).

529

530 **Genome assembly, gene annotation and quality assessment.** Chromosomal level reference genomes  
531 of the five *Sitopsis* species were assembled by a combination of Oxford Nanopore Technologies (ONT)  
532 single-molecule real-time technology and Hi-C based scaffolding strategy, followed by Illumina short  
533 read-based polishing. In brief, about 740-799 Gb (~114-178× genome coverage) high quality ONT long  
534 reads were generated using the PromethION platform and 262-302 Gb (~39.8-51.4×) short reads were  
535 obtained from the Illumina Noveseq platform (**Supplementary Table 5**). The long ONT reads were  
536 corrected using Canu<sup>48</sup> and assembled to long contigs by wtdbg2<sup>49</sup>. Then, the draft assemblies were  
537 polished using Racon<sup>50</sup> and Pilon<sup>51</sup> separately. The Hi-C data (~183-256×) was used to link the polished  
538 contigs into seven pseudochromosomes using LACHESIS<sup>52</sup>.

539 Protein coding genes and non-coding RNAs were predicted using *de novo* and homology gene  
540 blast strategies (see details in **Supplementary Notes**). All predicted protein coding genes were  
541 annotated based on KOG, KEGG and GO databases. Repetitive elements were identified by  
542 LTR\_FINDER<sup>53</sup> and RepeatScout<sup>54</sup>, and then annotated using RepeatMasker  
543 (<http://www.repeatmasker.org>). Quality validation of the genome assemblies were assessed by  
544 estimating the completeness of the gene repertoire using CEGMA<sup>55</sup> and BUSCO<sup>56</sup>.

545

546 **Phylogeny, divergence time and genetic introgression.** Phylogenetic topologies and divergence times  
547 of the *Triticum/Aegilops* species and outgroups were estimated based on whole genome resequencing  
548 data and single copy orthologous gene. Genome sequences and resequencing data of the five *Sitopsis*  
549 species were generated in this study. The other *Triticum/Aegilops* and outgroup species were obtained

550 from previously released reference genomes (**Supplementary Notes**). Phylogenetic trees were  
551 constructed using maximum likelihood method implemented in RAxML (v.8.2.12)<sup>57</sup> with GTR-  
552 GAMMA substitution model and 1,000 bootstrap replicates. Divergence times of the *Triticum/Aegilops*  
553 species were estimated using the program BEAST (v.2.6.0)<sup>58</sup>. Tree topologies were summarized using  
554 TreeAnnotator (v.2.6.0)<sup>58</sup> and visualized by ggtree<sup>59</sup>.

555 Genome-wide inter-specific genetic divergence was evaluated for the *Triticum/Aegilops* species  
556 by calculating the synonymous ( $d_s$ ), non-synonymous ( $d_n$ ) mutation rate based on PAML<sup>60</sup>. In addition,  
557 we also estimated pair-wise branch length and genetic similarity using *DendroPy* module<sup>61</sup> in Python.  
558 Genetic introgression among the A-, B- and D-lineages were estimated using a combination of the D-  
559 statistic, fd, hybrid index ( $\gamma$ ) and  $\chi^2$  goodness of fit test<sup>62-64</sup>. Introgressed variants among the four D-  
560 lineage *Sitopsis* species were identified based on the shared-specific SNPs for each species pair  
561 compared to the other species.

562

563 **Repetitive elements classification and expansion.** Full-length LTR retrotransposons in the five  
564 *Sitopsis* and the other *Triticum/Aegilops* species were characterized using LTR-harvest<sup>65</sup> and LTR-  
565 finder<sup>53</sup>. Then, the program RepeatScout<sup>54</sup> was employed to build consensus LTR retrotransposon  
566 sequences. DNA transposons were identified by a homology search against the REdat\_9.7\_Triticeae  
567 subset of the PGSB transposon library<sup>66</sup> using vmatch (<http://www.vmatch.de>). The above identified  
568 DNA transposons and LTR retrotransposons were classified into different families using RepeatMasker  
569 (<http://www.repeatmasker.org>) and CLARI-TE procedures<sup>67</sup>. Insertion time of each LTR  
570 retrotransposon family was estimated using the formula: age =  $K/2r$ , where K is the Kimura 2-parameter  
571 distance and r is the mutation rate of  $1.3 \times 10^{-8}$ <sup>28</sup>. K-mer analyses of these wheat genomes were  
572 performed by KAT<sup>68</sup> for each genome/subgenome.

573

574 **Genome collinearity and pan-genomic analyses.** Genome collinearity between the five *Sitopsis* and  
575 the other *Triticum/Aegilops* species was performed using MCscanX<sup>69</sup>. Inter-specific homologous genes  
576 were characterized using BLASTP with the default parameters. The resulting syntenic genomic regions  
577 were subjected to identify orthologous genes using ColinearScan<sup>70</sup>. Putative protogene (pPG) was  
578 characterized for the A-, B- and D-lineage respectively according to previously published protocols<sup>71,72</sup>.

579 Pan-genomic analyses were performed based on both the protein coding genes and genome  
580 structural variations (SVs). For the protein coding genes, all the three polyploid wheat subgenomes (A,  
581 B and D) and their diploid donors (*Ae. tauschii* and *T. urartu*) were mixed as a new *in silico* species  
582 called “ABD”. Then, the five *Sitopsis* species and “ABD” were used to identify gene families using  
583 OrthoFinder<sup>73</sup>. Gene family expansion and contraction were inferred using previous established  
584 phylogenomic approach<sup>25</sup>. Log-transformed gene family size among fifteen genomes and/or

585 subgenomes were compared using the phylANOVA function of phytools package  
586 (<https://github.com/liamrevell/phytools>) in R according to the guidance of the phylogenetic species tree.  
587 Genome SVs of the *Ae. tauschii*, *T. urartu* and five *Sitopsis* species were characterized based on the  
588 ONT data. The corrected ONT long reads were mapped onto the bread wheat (Chinese Spring) B-  
589 subgenome IWGSC\_v1.0 using minimap2<sup>74</sup> and predicted using Sniffles<sup>75</sup>. Only the unique mapped  
590 reads with mapping quality >30, depth >10 and alternative allele ratio >0.2 were kept for subsequent  
591 analyses. GO enrichment of the candidate protein coding and SV-related genes were performed using  
592 ClusterProfiler<sup>76</sup>.

593

594 **Identification of resistance and agronomic-related gene.** The nucleotide-binding and leucine-rich  
595 repeat immune receptor (NLR) genes were identified using NLR-Annotator pipeline<sup>77</sup>. In brief,  
596 candidate NLR genes were predicted by searching CDS sequences against the Pfam database  
597 (<https://pfam.xfam.org>). Custom Python script was used to classify NLR genes according to the position  
598 of intron located inside or outside of NB\_ARC domain. The other agronomic-related genes in the five  
599 *Sitopsis* species were identified by searching the CDS sequences of candidate genes onto the genome  
600 assemblies using BLASTN with E-value < 10<sup>e-5</sup> and hits length > 300bp. All candidate hits were  
601 manually checked and compared with corresponding protein annotation databases.

602

## 603 **References**

- 604 1. Shewry, P.R. & Hey, S.J. The contribution of wheat to human diet and health. *Food Energy Secur.*  
605 **4**, 178-202 (2015).
- 606 2. Feldman, M., Lupton, F. & Miller, T. Wheats, pp. 184–192 in *Evolution of Crop Plants*, Ed. 2nd,  
607 edited by J. Smartt, NW Simmonds. (Longman Scientific, London, 1995).
- 608 3. Nesbitt, M. & Samuel D. From staple crop to extinction? The archaeology and history of hulled  
609 wheat. In: *Hulled Wheat: Promoting the Conservation and Use of Underutilized and Neglected*  
610 *Crops*, vol 4. pp.41-100 (Castelvecchio Pascoli, Italy, 1995).
- 611 4. Marcussen, T. *et al.* Ancient hybridizations among the ancestral genomes of bread wheat. *Science*  
612 **345**, 1250092-1250092 (2014).
- 613 5. Gornicki, P. *et al.* The chloroplast view of the evolution of polyploid wheat. *New Phytol.* **204**, 704-  
614 714 (2014).
- 615 6. Kihara, H. Discovery of the DD-analyser, one of the ancestors of *Triticum vulgare*. *Agric. Hort.*  
616 **19**, 13-14 (1944).
- 617 7. Dvořák, J. The relationship between the genome of *Triticum urartu* and the A and B genomes of  
618 *Triticum aestivum*. *Can. J. of Genet. Cytol.* **18**, 371-377 (1976).

- 619 8. Sarkar, P. & Stebbins, G. Morphological evidence concerning the origin of the B genome in wheat.  
620 *Am. J. Bot.* **43**, 297-304 (1956).
- 621 9. Riley, R., Unrau, J. & Chapman, V. Evidence on the origin of the B genome of wheat. *J. Hered.*  
622 **49**, 91-98 (1958).
- 623 10. Kimber, G. & Athwal, R. A reassessment of the course of evolution of wheat. *P. Natl. Acad. Sci.*  
624 *USA.* **69**, 912-915 (1972).
- 625 11. Gill, B.S. & Kimber, G. Giemsa C-banding and the evolution of wheat. *P. Natl. Acad. Sci. USA.*  
626 **71**, 4086-4090 (1974).
- 627 12. Ruban, A.S. & Badaeva, E.D. Evolution of the S-genomes in *Triticum-Aegilops* alliance:  
628 Evidences from chromosome analysis. *Front. Plant Sci.* **9**, 1756 (2018).
- 629 13. Miki, Y. *et al.* Origin of wheat B-genome chromosomes inferred from RNA sequencing analysis  
630 of leaf transcripts from section *Sitopsis* species of *Aegilops*. *DNA Res.* **26**, 171-182 (2019).
- 631 14. Petersen, G., Seberg, O., Yde, M. & Berthelsen, K. Phylogenetic relationships of *Triticum* and  
632 *Aegilops* and evidence for the origin of the A, B, and D genomes of common wheat (*Triticum*  
633 *aestivum*). *Mol. Phylogenet. Evol.* **39**, 70-82 (2006).
- 634 15. Huang, S. *et al.* Genes encoding plastid acetyl-CoA carboxylase and 3-phosphoglycerate kinase  
635 of the *Triticum/Aegilops* complex and the evolutionary history of polyploid wheat. *P. Natl. Acad.*  
636 *Sci. USA.* **99**, 8133-8138 (2002).
- 637 16. Kilian, B. *et al.* Independent wheat B and G genome origins in outcrossing *Aegilops* progenitor  
638 haplotypes. *Mol. Biol. Evol.* **24**, 217-227 (2007).
- 639 17. Salse, J. *et al.* New insights into the origin of the B genome of hexaploid wheat: evolutionary  
640 relationships at the *SPA* genomic region with the S genome of the diploid relative *Aegilops*  
641 *speltoides*. *BMC Genomics* **9**, 555 (2008).
- 642 18. El Baidouri, M. *et al.* Reconciling the evolutionary origin of bread wheat (*Triticum aestivum*). *New*  
643 *Phytol.* **213**, 1477-1486 (2017).
- 644 19. Zohary, D. & Feldman, M. Hybridization between amphidiploids and the evolution of polyploids  
645 in the wheat (*Aegilops-Triticum*) group. *Evolution* **16**, 44-61 (1962).
- 646 20. Natarajan, A. & Sarma, N. Chromosome banding patterns and the origin of the B genome in wheat.  
647 *Genet. Res.* **24**, 103-108 (1974).
- 648 21. Glémin, S. *et al.* Pervasive hybridizations in the history of wheat relatives. *Sci. Adv.* **5**, eaav9188  
649 (2019).
- 650 22. Avni, R. *et al.* Wild emmer genome architecture and diversity elucidate wheat evolution and  
651 domestication. *Science* **357**, 93-97 (2017).
- 652 23. Ling, H. *et al.* Genome sequence of the progenitor of wheat A subgenome *Triticum urartu*. *Nature*  
653 **557**, 424-428 (2018).
- 654 24. Luo, M. *et al.* Genome sequence of the progenitor of the wheat D genome *Aegilops tauschii*.  
655 *Nature* **551**, 498-502 (2017).

- 656 25. Appels, R. *et al.* Shifting the limits in wheat research and breeding using a fully annotated  
657 reference genome. *Science* **361**, eaar7191 (2018).
- 658 26. Maccaferri, M. *et al.* Durum wheat genome highlights past domestication signatures and future  
659 improvement targets. *Nat. Genet.* **51**, 885-895 (2019).
- 660 27. Walkowiak, S. *et al.* Multiple wheat genomes reveal global variation in modern breeding. *Nature*  
661 **588**, 277–283 (2020).
- 662 28. Wicker, T. *et al.* Impact of transposable elements on genome structure and evolution in bread  
663 wheat. *Genome Biol.* **19**, 1-18 (2018).
- 664 29. Dvorak, J. *et al.* Reassessment of the evolution of wheat chromosomes 4A, 5A, and 7B. *Teor. Appl.*  
665 *Genet.* **131**, 2451-2462 (2018).
- 666 30. Ankori, H. & Zohary, D. Natural hybridization between *Aegilops sharonensis* and *Ae. longissima*:  
667 a morphological and cytological study. *Cytologia* **27**, 314-324 (1962).
- 668 31. Ogihara, Y. & Tsunewaki, K. Diversity and evolution of chloroplast DNA in *Triticum* and  
669 *Aegilops* as revealed by restriction fragment analysis. *Teor. Appl. Genet.* **76**, 321-332 (1988).
- 670 32. Dvorak, J. & Zhang, H.-B. Variation in repeated nucleotide sequences sheds light on the phylogeny  
671 of the wheat B and G genomes. *P. Natl. Acad. Sci. USA.* **87**, 9640-9644 (1990).
- 672 33. Huynh, S., Marcussen, T., Felber, F. & Parisod, C. Hybridization preceded radiation in diploid  
673 wheats. *Mol. Phylogenet. Evol.* **139**, 106554 (2019).
- 674 34. Bernhardt, N. *et al.* Genome-wide sequence information reveals recurrent hybridization among  
675 diploid wheat wild relatives. *Plant J.* **102**, 493-506 (2020).
- 676 35. Kihara, H. Considerations on the evolution and distribution of *Aegilops* species based on the  
677 analyser-method. *Cytologia* **19**, 336-357 (1954).
- 678 36. Waines, J.G. & Johnson, B.L. Genetic differences between *Aegilops longissima*, *A. sharonensis*,  
679 and *A. bicornis*. *Can. J. of Genet. Cytol.* **14**, 411-415 (1972).
- 680 37. Feldman, M. & Levy, A.A. Origin and evolution of wheat and related Triticeae species. In:  
681 *Molnár-Láng M., Ceoloni C., Doležel J. (eds) Alien Introgression in Wheat* pp.21-76 (Springer,  
682 2015).
- 683 38. Zhang, H. *et al.* Large-scale transcriptome comparison reveals distinct gene activations in wheat  
684 responding to stripe rust and powdery mildew. *BMC Genomics* **15**, 898 (2014).
- 685 39. Simons, K.J. *et al.* Molecular characterization of the major wheat domestication gene *Q*. *Genetics*  
686 **172**, 547-555 (2006).
- 687 40. Faris, J.D. & Gill, B.S. Genomic targeting and high-resolution mapping of the domestication gene  
688 *Q* in wheat. *Genome* **45**, 706-718 (2002).
- 689 41. Zhang, Z. *et al.* Duplication and partitioning in evolution and function of homoeologous *Q* loci  
690 governing domestication characters in polyploid wheat. *P. Natl. Acad. Sci. USA.* **108**, 18737-18742  
691 (2011).

- 692 42. Zhang, H. *et al.* Intrinsic karyotype stability and gene copy number variations may have laid the  
693 foundation for tetraploid wheat formation. *P. Natl. Acad. Sci. USA*. **110**, 19466-19471 (2013).
- 694 43. Wang, X. *et al.* Transcriptome asymmetry in synthetic and natural allotetraploid wheats, revealed  
695 by RNA-sequencing. *New Phytol.* **209**, 1264-1277 (2016).
- 696 44. Greenwood, J.R., Finnegan, E.J., Watanabe, N., Trevaskis, B. & Swain, S.M. New alleles of the  
697 wheat domestication gene *Q* reveal multiple roles in growth and reproductive development.  
698 *Development* **144**, 1959-1965 (2017).
- 699 45. Jenkins, J. Chromosome homologies in wheat and *Aegilops*. *Am. J. Bot.* **16**, 238-245 (1929).
- 700 46. Han, F., Fedak, G., Guo, W. & Liu, B. Rapid and repeatable elimination of a parental genome-  
701 specific DNA repeat (pGc1R-1a) in newly synthesized wheat allopolyploids. *Genetics* **170**, 1239-  
702 1245 (2005).
- 703 47. Kato, A., Lamb, J.C. & Birchler, J.A. Chromosome painting using repetitive DNA sequences as  
704 probes for somatic chromosome identification in maize. *P. Natl. Acad. Sci. USA*. **101**, 13554-  
705 13559 (2004).
- 706 48. Koren, S. *et al.* Canu: scalable and accurate long-read assembly via adaptive k-mer weighting and  
707 repeat separation. *Genome Res.* **27**, 722-736 (2017).
- 708 49. Ruan, J. & Li, H. Fast and accurate long-read assembly with wtdbg2. *Nat. Methods* **17**, 155-158  
709 (2020).
- 710 50. Vaser, R., Sović, I., Nagarajan, N. & Šikić, M. Fast and accurate de novo genome assembly from  
711 long uncorrected reads. *Genome Res.* **27**, 737-746 (2017).
- 712 51. Walker, B.J. *et al.* Pilon: an integrated tool for comprehensive microbial variant detection and  
713 genome assembly improvement. *PloS ONE* **9**, e112963 (2014).
- 714 52. Burton, J.N. *et al.* Chromosome-scale scaffolding of de novo genome assemblies based on  
715 chromatin interactions. *Nat. Biotechnol.* **31**, 1119-1125 (2013).
- 716 53. Xu, Z. & Wang, H. LTR\_FINDER: an efficient tool for the prediction of full-length LTR  
717 retrotransposons. *Nucleic Acids Res.* **35**, W265-W268 (2007).
- 718 54. Price, A.L., Jones, N.C. & Pevzner, P.A. *De novo* identification of repeat families in large genomes.  
719 *Bioinformatics* **21**, i351-i358 (2005).
- 720 55. Parra, G., Bradnam, K. & Korf, I. CEGMA: a pipeline to accurately annotate core genes in  
721 eukaryotic genomes. *Bioinformatics* **23**, 1061-1067 (2007).
- 722 56. Simão, F.A., Waterhouse, R.M., Ioannidis, P., Kriventseva, E.V. & Zdobnov, E.M. BUSCO:  
723 assessing genome assembly and annotation completeness with single-copy orthologs.  
724 *Bioinformatics* **31**, 3210-3212 (2015).
- 725 57. Stamatakis, A. RAxML version 8: a tool for phylogenetic analysis and post-analysis of large  
726 phylogenies. *Bioinformatics* **30**, 1312-1313 (2014).
- 727 58. Suchard, M.A. *et al.* Bayesian phylogenetic and phylodynamic data integration using BEAST 1.10.  
728 *Virus Evol.* **4**, vey016 (2018).

- 729 59. Yu, G., Smith, D.K., Zhu, H., Guan, Y. & Lam, T.T.Y. ggtree: an R package for visualization and  
730 annotation of phylogenetic trees with their covariates and other associated data. *Methods*  
731 *Ecol. Evol.* **8**, 28-36 (2017).
- 732 60. Yang, Z. PAML 4: phylogenetic analysis by maximum likelihood. *Mol. Biol. Evol.* **24**, 1586-1591  
733 (2007).
- 734 61. Sukumaran, J. & Holder, M.T. DendroPy: a Python library for phylogenetic computing.  
735 *Bioinformatics* **26**, 1569-1571 (2010).
- 736 62. Martin, S.H., Davey, J.W. & Jiggins, C.D. Evaluating the use of ABBA–BABA statistics to locate  
737 introgressed Loci. *Mol. Biol. Evol.* **32**, 244-257 (2015).
- 738 63. Blischak, P.D., Chifman, J., Wolfe, A.D. & Kubatko, L. HyDe: a Python package for genome-  
739 scale hybridization detection. *Syst. Biol.* **67**, 821-829 (2018).
- 740 64. Suvorov, A. *et al.* Deep ancestral introgression shapes evolutionary history of dragonflies and  
741 damselflies. *bioRxiv*, doi: <https://doi.org/10.1101/2020.06.25.172619> (2020).
- 742 65. Ellinghaus, D., Kurtz, S. & Willhoeft, U. LTRharvest, an efficient and flexible software for de  
743 novo detection of LTR retrotransposons. *BMC Bioinformatics* **9**, 18 (2008).
- 744 66. Spannagl, M. *et al.* PGSB PlantsDB: updates to the database framework for comparative plant  
745 genome research. *Nucleic Acids Res.* **44**, D1141-7 (2016).
- 746 67. Daron, J. *et al.* Organization and evolution of transposable elements along the bread wheat  
747 chromosome 3B. *Genome Biol.* **15**, 546 (2014).
- 748 68. Mapleson, D., Garcia Accinelli, G., Kettleborough, G., Wright, J. & Clavijo, B.J. KAT: a K-mer  
749 analysis toolkit to quality control NGS datasets and genome assemblies. *Bioinformatics* **33**, 574-  
750 576 (2017).
- 751 69. Wang, Y. *et al.* MCSscanX: a toolkit for detection and evolutionary analysis of gene synteny and  
752 collinearity. *Nucleic Acids Res.* **40**, e49-e49 (2012).
- 753 70. Wang, X. *et al.* Statistical inference of chromosomal homology based on gene colinearity and  
754 applications to Arabidopsis and rice. *BMC Bioinformatics* **7**, 447 (2006).
- 755 71. Murat, F., Armero, A., Pont, C., Klopp, C. & Salse, J. Reconstructing the genome of the most  
756 recent common ancestor of flowering plants. *Nat Genet.* **49**, 490-496 (2017).
- 757 72. Pont, C. *et al.* Paleogenomics: reconstruction of plant evolutionary trajectories from modern and  
758 ancient DNA. *Genome Biol.* **20**, 29 (2019).
- 759 73. Emms, D. & Kelly, S.L. OrthoFinder: phylogenetic orthology inference for comparative genomics.  
760 *Genome Bio.* **20**, 238 (2019).
- 761 74. Li, H. Minimap2: pairwise alignment for nucleotide sequences. *Bioinformatics* **34**, 3094-3100  
762 (2018).
- 763 75. Sedlazeck, F.J. *et al.* Accurate detection of complex structural variations using single-molecule  
764 sequencing. *Nat. Methods* **15**, 461-468 (2018).

- 765 76. Yu, G., Wang, L.G., Han, Y. & He, Q. clusterProfiler: an R package for comparing biological  
766 themes among gene clusters. *Omic*s **16**, 284-287 (2012).
- 767 77. Zhang, W. NLR-Annotator: A tool for *de novo* annotation of intracellular immune receptor  
768 repertoire. *Plant Physiol.* **183**, 418-420 (2020).



769 **Tables:**

770 **Table 1. Statistics of genome features of the five *Sitopsis* species.**

771

| Assembly parameters  |                                | <i>Ae. bicornis</i> | <i>Ae. longissima</i> | <i>Ae. searsii</i> | <i>Ae. sharonensis</i> | <i>Ae. speltoides</i> |
|----------------------|--------------------------------|---------------------|-----------------------|--------------------|------------------------|-----------------------|
| Genome assembly      | Genome size* (Gb)              | 5.54                | 6.02                  | 5.37               | 5.95                   | 4.45                  |
|                      | Total length of contigs (Gb)   | 5.64                | 5.80                  | 5.34               | 5.89                   | 4.11                  |
|                      | GC content (%)                 | 46.39               | 46.40                 | 46.01              | 46.24                  | 46.34                 |
|                      | N50 length (contig) (Mb)       | 8.72                | 1.05                  | 0.56               | 1.01                   | 1.78                  |
| Repetitive sequence  | Retrotransposons (Gb)          | 3.99                | 4.15                  | 3.55               | 4.21                   | 2.94                  |
|                      | DNA transposons (Gb)           | 1.01                | 0.89                  | 1.03               | 0.91                   | 0.52                  |
|                      | Total (Gb)                     | 5.08                | 5.11                  | 4.64               | 5.19                   | 3.54                  |
| Protein-coding genes | Predicted protein-coding gene  | 61,354              | 63,326                | 62,804             | 61,849                 | 61,084                |
|                      | High confidence gene           | 40,222              | 37,201                | 37,995             | 38,440                 | 37,607                |
|                      | Average transcript length (bp) | 1,484               | 1,657                 | 1,554              | 1,627                  | 1,622                 |
|                      | Average CDS length (bp)        | 1,193               | 1,293                 | 1,290              | 1,289                  | 1,319                 |
|                      | Average exon length (bp)       | 325                 | 358                   | 329                | 351                    | 348                   |
|                      | Average intron length (bp)     | 507                 | 527                   | 860                | 818                    | 834                   |
|                      | Functionally annotated         | 37,082              | 36,539                | 37,489             | 37,798                 | 37,301                |
|                      | BUSCO integrity (%)            | 97.99               | 94.03                 | 92.92              | 93.19                  | 93.75                 |

772 Note: \*, Genome size was estimated by flow cytometry.

773 **Figures:**

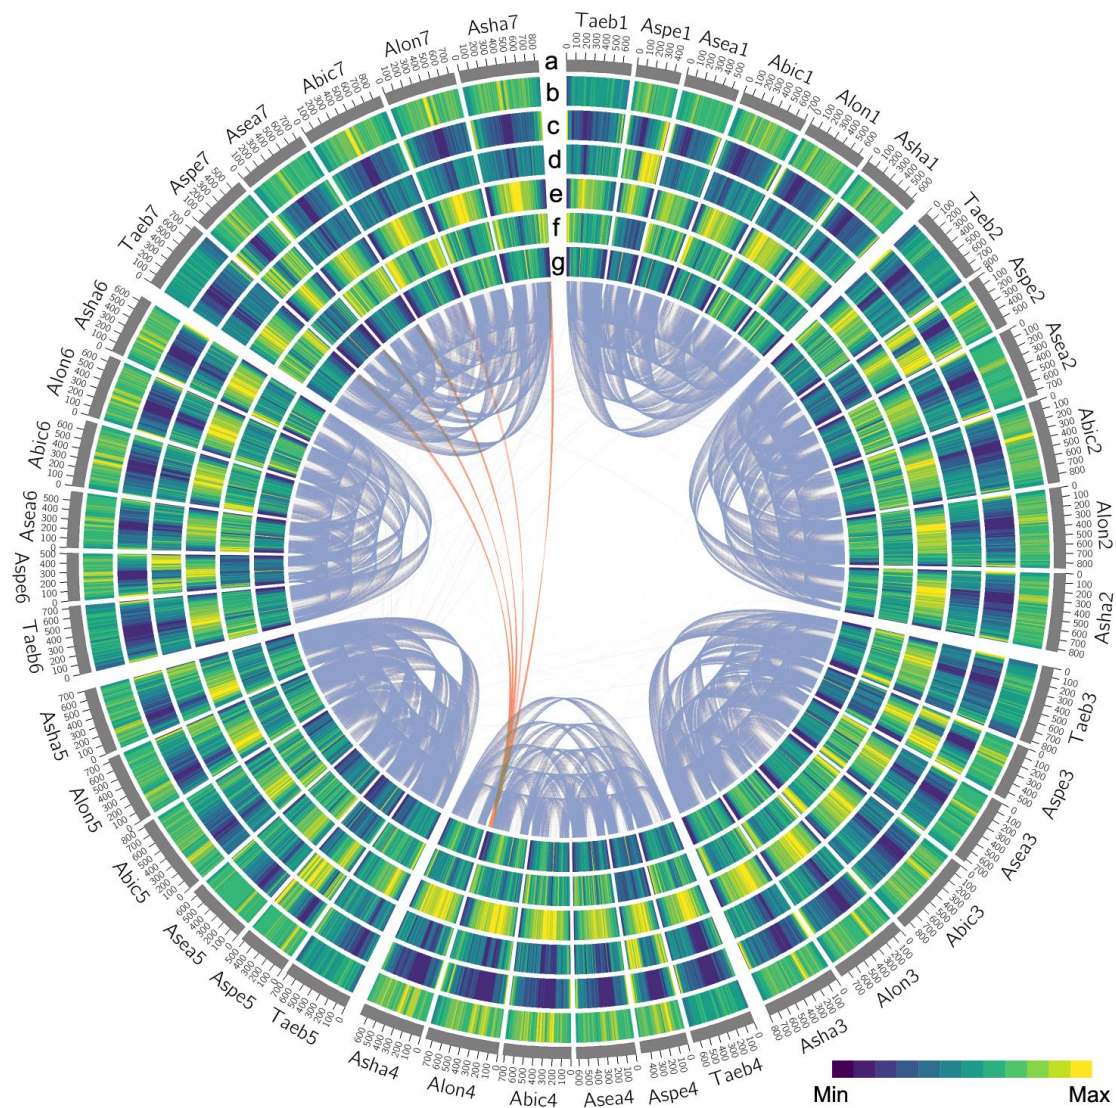

774

775 **Figure 1. Structural, functional, and syntenic landscape of the five *Sitopsis* species and bread**  
776 **wheat B-subgenome.** Circular diagram from outside to inside are: **a**, Species and chromosome names,  
777 each tick mark is 100 Mb in length. **b**, Percent of GC content. **c**, Density of high confidence gene (0-21  
778 per Mb). **d**, *The copia-like* retrotransposon density. **e**, *The gypsy-like* retrotransposon density. **f**, *CACTA*  
779 DNA transposon density. **g**, Distribution of unique 20-mer frequencies across physical chromosomes  
780 (5-160 K-mer/Mb). Color of links is blue between homeologous chromosomes and orange in cases of  
781 large translocations. Note: Abic: *Ae. bicornis*, Alon: *Ae. longissima*, Asea: *Ae. searsii*, Asha: *Ae.*  
782 *shanronensis*, Aspe: *Ae. speltoides*, Taeb: B-subgenome of the bread wheat.

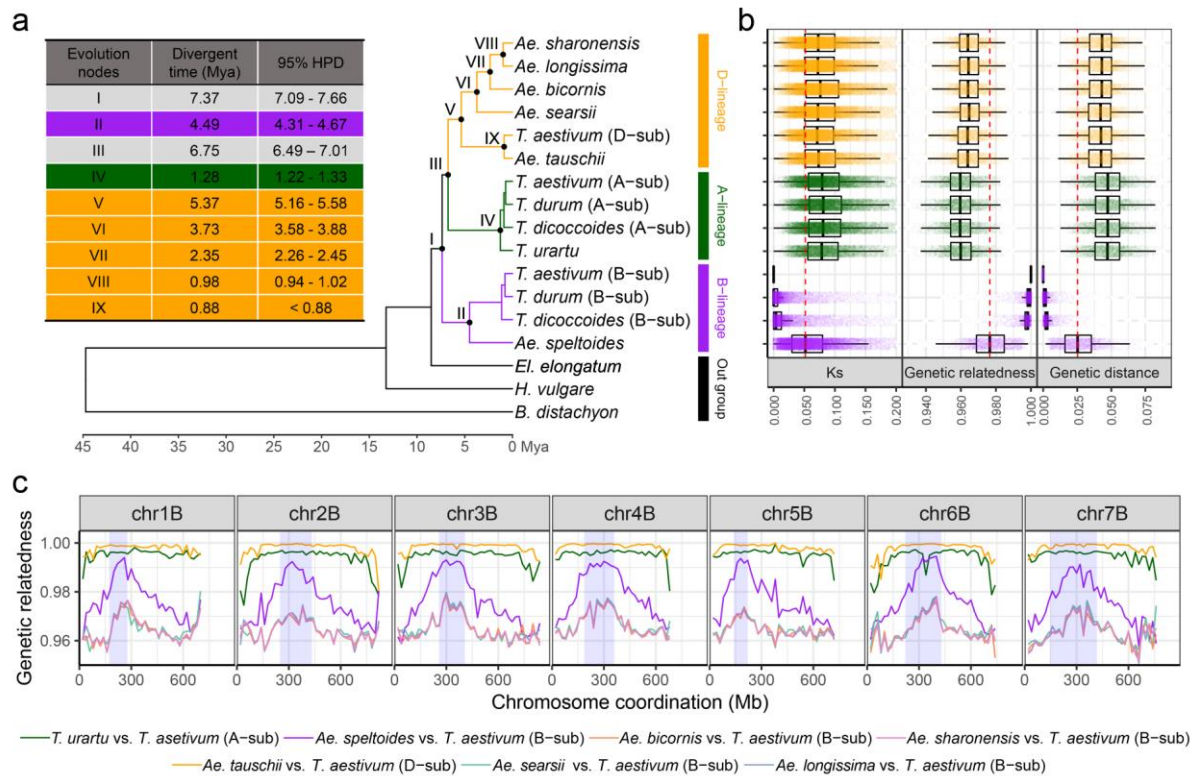

783

784

785

786

787

788

789

790

791

792

793

794

795

796

797

798

**Figure 2. Phylogenetic relationships, divergence times and genetic similarities of the *Triticum/Aegilops* species complex.** **a**, Maximum likelihood tree and divergence times of the *Triticum/Aegilops* species complex based on single copy orthologous genes. The green, purple and orange branches represent the A-, B- and D-lineages, respectively. Black color branches are the common ancestor of *Triticum/Aegilops* species and outgroup species. **b**, Synonymous mutation rate (Ks), genetic relatedness and genetic distance between the bread wheat B-subgenome and the other diploid species and polyploid wheat subgenomes based on collinear genes and reduced representative genomic regions. Green, purple and orange colors indicate these comparisons were obtained from the A-, B- and D-lineages. Numbers on the X-axis are the values of genetic similarity. Red dashed line indicates the mean values between *Ae. speltoides* and bread wheat B-subgenome. **c**, Distribution of the genetic relatedness between the five *Sitopsis* species and bread wheat B-subgenome, as well as between the bread wheat A- and D-subgenomes and their diploid donors (*T. urartu* and *Ae. tauschii*) along the seven chromosomes based on reduced representative genomic regions. The centromere of each chromosome is highlighted by purple color. Numbers on Y-axis are the values of genetic relatedness. Coordinates of each chromosome are shown in the X-axis.

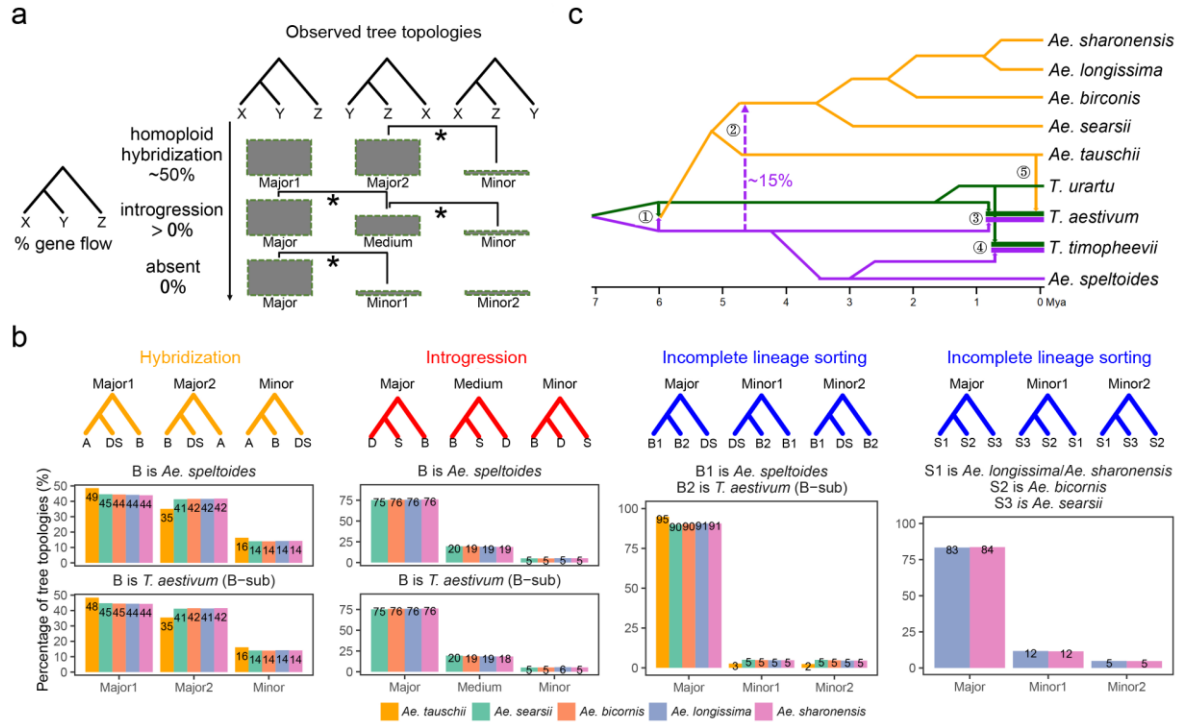

799

800 **Figure 3. Estimates of genetic introgression in the *Triticum/Aegilops* species complex.** **a**, Three  
 801 typical incongruent types between the species tree and gene tree based on reduced representative  
 802 genomic regions. From up to bottom are: homoploid hybridization, genetic introgression and  
 803 incomplete lineage sorting (ILS). The three incongruent types are distinguished by the numbers of each  
 804 tree topology. Significance is determined by the  $\chi^2$ -test with  $p$ -value < 0.001 (shown as asterisk). In  
 805 homoploid hybridization type, numbers of both the two “major” topologies (“major1” and “major2”,  
 806  $2 > n_{\text{major1}}/n_{\text{major1}} > 1/2$ ) are significantly higher than the “minor” topology. In genetic introgression type,  
 807 the number of “major” topology is significantly higher than “medium” topology. Likewise, the medium”  
 808 topology is also significantly higher than “minor” topology. In ILS type, numbers of both the two  
 809 “minor” topologies (“minor1” and “minor2”) are less than “major” topology but which are not  
 810 statistically significant. **b**, Examples of the three incongruent types identified in the *Triticum/Aegilops*  
 811 species complex, including homoploid hybridization between ancestral A- and B- lineages (orange),  
 812 genetic introgressions from B-lineage (ancestor of *Ae. speltoides* and B-subgenome) to ancestor of the  
 813 four D-lineage *Sitopsis* species (red), ILS between B- and D-lineages (blue), and ILS among the four  
 814 D-lineage *Sitopsis* species (blue). Percentages of these trees are shown below the tree topology. Colors  
 815 in the barplot represent the five D-lineage species. **c**, Evolutionary scenario of the *Triticum/Aegilops*  
 816 species complex based on the integrated estimates of genetic introgression. The numbers ① and ②  
 817 indicate the ancestral homoploid hybridization between A- and B-lineages and B- to D-lineage ancestral  
 818 genetic introgression event, respectively. The remaining three numbers (③, ④ and ⑤) represent the  
 819 allopolyploidization events that formed tetraploid *T. turgidum* ssp. *dicoccoides*, tetraploid *T.*  
 820 *araraticum* and hexaploid *T. aestivum*.

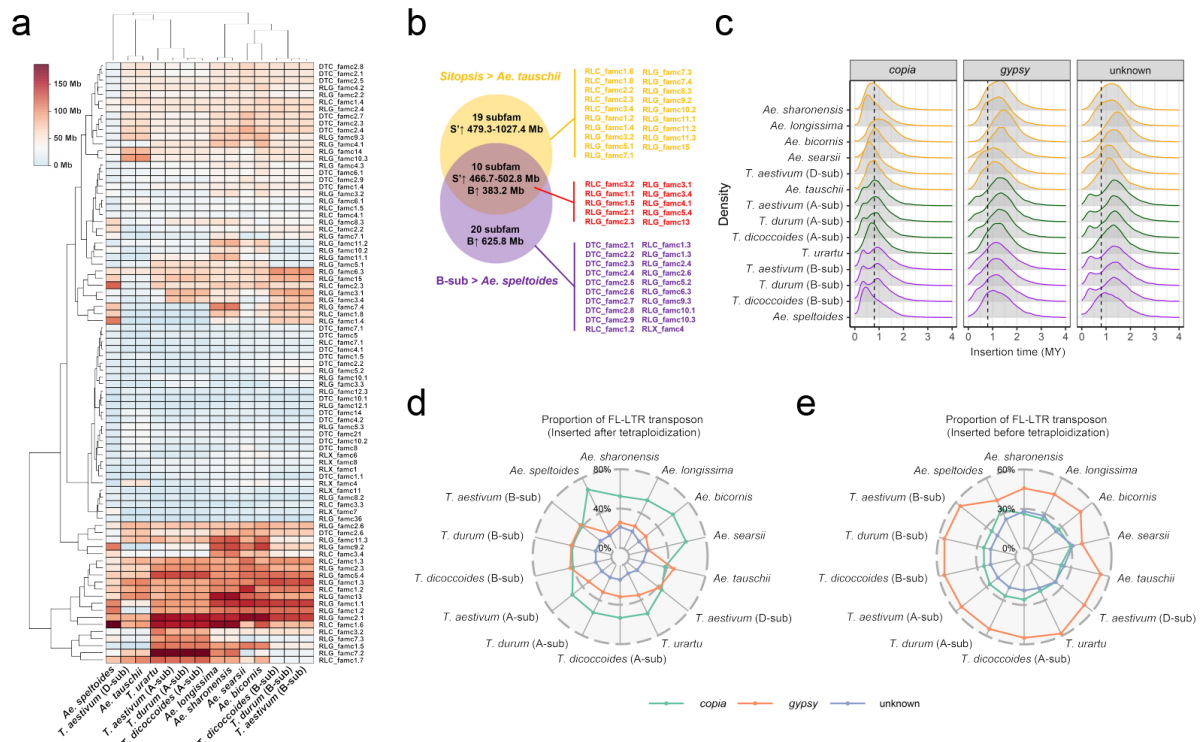

821

822 **Figure 4. Evolutionary dynamics and insertion times of transposable elements in the**  
 823 ***Triticum/Aegilops* species complex. a**, Heatmap of the lengths of the 85 transposable element (TE)  
 824 subfamilies in the diploid species and polyploid wheat subgenomes. Scale bar on the top left corner  
 825 denotes the length of each TE subfamily. **b**, Intersection analysis of the TE subfamilies that are  
 826 expanded specifically in B- (purple color, 20 subfamilies) and D-lineages (orange color, 19 subfamilies),  
 827 as well as these shared between the two lineages (red color, 10 subfamilies). Total length of these  
 828 expanded TE subfamilies are shown in each section. The character S' and B indicate the four D-lineage  
 829 *Sitopsis* species and bread wheat B-subgenome, respectively. Black arrows after the S' and B indicate  
 830 the increased genome size in these genomes compared to their close relatives. The expanded TE  
 831 subfamilies are listed on the right. **c**, Insertion times of the retrotransposons in the diploid species and  
 832 polyploid wheat subgenomes. Green, purple and orange colors represent the A-, B- and D-lineages,  
 833 respectively. **d** and **e**, Proportions of the expanded full length long-terminal repeat (FL-LTR)  
 834 transposons in the diploid species and polyploid wheat subgenomes before and after the  
 835 tetraploidization speciation event (~0.8 MYA). Light green, orange and blue colors are the *copia*-like,  
 836 *gypsy*-like and unknown retrotransposons, respectively.
